# Supplementary material for: Exploring fear in human-robot interaction: a scoping review of older adults’ experiences with social robots
Source: Frontiers journal article supplement (doi:10.3389/frobt.2025.1626471), 2025-10-13
Supplement: Data_Sheet_1.pdf [file Data_Sheet_1.pdf]

## Supplementary Material 1: PRISMA-ScR Checklist Item

| Section                          | Item  | PRISMA-ScR Checklist Item                                                                                                                                                                                                                                             | Location in Manuscript |
|----------------------------------|-------|-----------------------------------------------------------------------------------------------------------------------------------------------------------------------------------------------------------------------------------------------------------------------|------------------------|
| TITLE                            |       |                                                                                                                                                                                                                                                                       |                        |
| Title                            | 0     | Identify the report as a scoping review.                                                                                                                                                                                                                              | Title page             |
| ABSTRACT                         |       |                                                                                                                                                                                                                                                                       |                        |
| Structured summary               | 1     | Provide a structured summary that includes (as applicable) Abstract background, objectives, eligibility criteria, sources of evidence, section charting methods, results, and conclusions related to the review questions and objectives.                             |                        |
| INTRODUCTION                     |       |                                                                                                                                                                                                                                                                       |                        |
| Rationale                        | 2     | Describe the rationale for the review in the context of what is Section 2.1-2.4 already known. Explain why the review questions/objectives lend themselves to a scoping review approach.                                                                              |                        |
| Objectives                       | 3     | Provide an explicit statement of the questions and objectives Section 3 addressed regarding their key elements (e.g., population or participants, concepts, and context) or other relevant key elements used to conceptualize the review questions and/or objectives. |                        |
| METHODS                          |       |                                                                                                                                                                                                                                                                       |                        |
| Protocol registration            | and 4 | Indicate whether a review protocol exists; state if and where it can Section 4.1 be accessed (e.g., a Web address); and provide registration information, including the registration number if available.                                                             |                        |
| Eligibility criteria             | 5     | Specify characteristics of the sources of evidence used as eligibility Section 4.2 criteria (e.g., years considered, language, and publication status) and provide a rationale.                                                                                       |                        |
| Information sources              | 6     | Describe all information sources in the search (e.g., databases with Section 4.3 dates of coverage and contact with authors to identify additional sources) and the date the most recent search was executed.                                                         |                        |
| Search                           | 7     | Present the complete electronic search strategy for at least one Section 4.4, database, including any limits used, so it could be repeated.                                                                                                                           | Appendix A             |
| Selection of sources of evidence | 8     | State the process for selecting sources of evidence (i.e., screening Section 4.5 and eligibility) included in the scoping review.                                                                                                                                     |                        |
| Data charting process            | 9     | Describe the methods of charting data from the included sources of Section 4.6 evidence (e.g., calibrated forms or forms that the team has tested before their use, and whether data charting was done independently                                                  |                        |

| Section                                              | Item | PRISMA-ScR Checklist Item                                                                                                                                                                             | Location in Manuscript         |
|------------------------------------------------------|------|-------------------------------------------------------------------------------------------------------------------------------------------------------------------------------------------------------|--------------------------------|
|                                                      |      | or in duplicate) and any processes for obtaining and confirming data from investigators.                                                                                                              |                                |
| Data items                                           | 10   | List and define all variables for which data were sought and any assumptions and simplifications made.                                                                                                | Section 4.7                    |
| Critical appraisal of individual sources of evidence | 11   | If done, provide a rationale for conducting a critical appraisal of included sources of evidence; describe the methods used and how this information was used in any data synthesis (if appropriate). | Section 4.7                    |
| Synthesis of results                                 | 12   | Describe the methods of handling and summarizing the data that were charted.                                                                                                                          | Section 4.8                    |
| RESULTS                                              |      |                                                                                                                                                                                                       |                                |
| Selection of sources of evidence                     | 13   | Give numbers of sources of evidence screened, assessed for eligibility, and included in the review, with reasons for exclusions at each stage, ideally using a flow diagram.                          | Section 5.1, Figure 1          |
| Characteristics of sources of evidence               | 14   | For each source of evidence, present characteristics for which data were charted and provide the citations.                                                                                           | Section 5.2, Table 1           |
| Critical appraisal of sources of evidence            | 15   | If done, present data on critical appraisal of included sources of evidence (see item 12).                                                                                                            | Section 4.3                    |
| Results of individual sources of evidence            | 16   | For each included source of evidence, present the relevant data that was charted that relates to the review questions and objectives.                                                                 | Section 4.4                    |
| Synthesis of results                                 | 17   | Summarize and/or present the charting results related to the review questions and objectives.                                                                                                         | Section 4.5, Figure 3, Table 2 |
| DISCUSSION                                           |      |                                                                                                                                                                                                       |                                |
| Summary of evidence                                  | 18   | Summarize the main results (including an overview of concepts, themes, and types of evidence available), link to the review questions and objectives, and consider the relevance to key groups.       | Section 5.1-5.4                |
| Limitations                                          | 19   | Discuss the limitations of the scoping review process.                                                                                                                                                | Section 5.5-5.6                |
| Conclusions                                          | 20   | Provide a general interpretation of the results concerning the review questions, objectives, and potential implications and/or next steps.                                                            | Section 6                      |
| FUNDING                                              |      |                                                                                                                                                                                                       |                                |
| Funding                                              | 21   | Describe funding sources for the included sources of evidence and the scoping review. Describe the role of the funders of the scoping review.                                                         | Not applicable                 |
